# Supplementary material
Source: PubMed Central journal article supplement (PMC1637075)

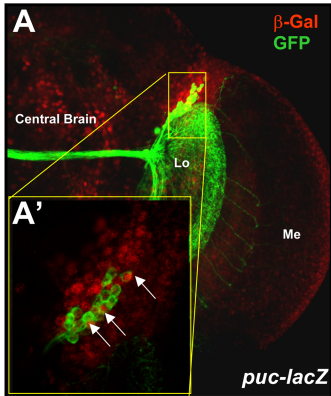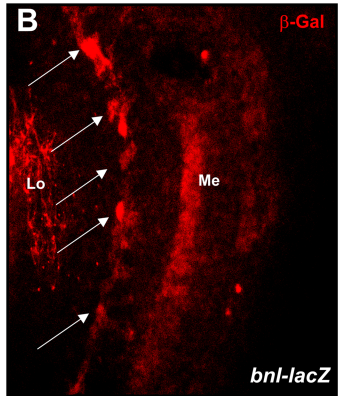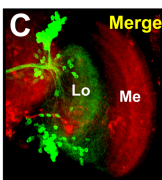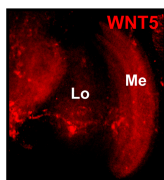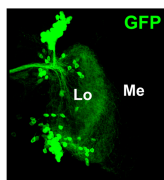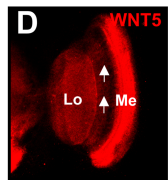

Supplement: pbio.0040348.sg001.pdf [file pbio.0040348.sg001.pdf]

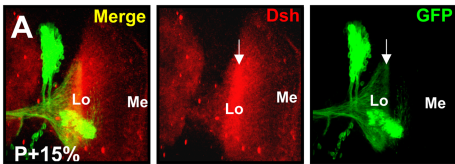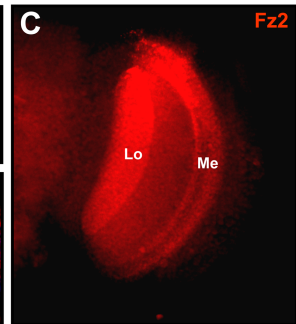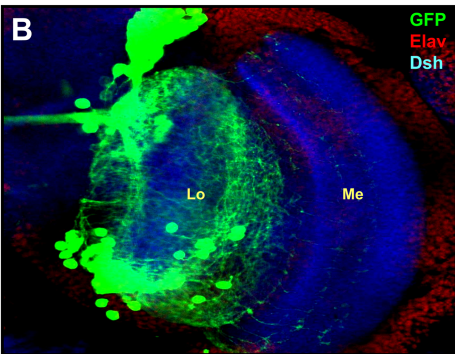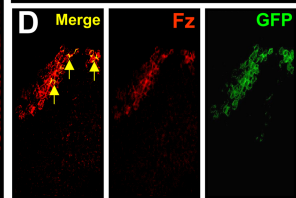

Supplement: pbio.0040348.sg002.pdf [file pbio.0040348.sg002.pdf]

**A***P+20-30%***1XUAS- *bt1DN*****B***P+20-30%****dsh<sup>1</sup> -/-***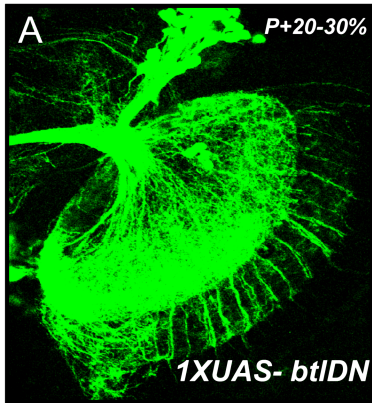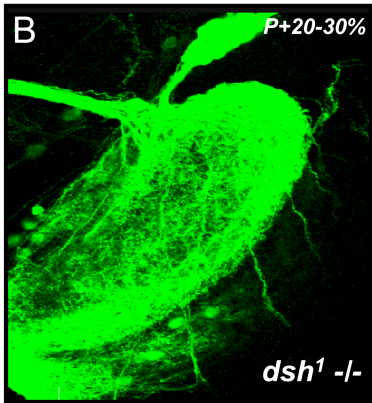

Supplement: pbio.0040348.sg003.pdf [file pbio.0040348.sg003.pdf]
